# Supplementary material
Source: PubMed Central journal article supplement (PMC6721934)
Supplement: supp_RA119.009291_152730_2_supp_360630_pqfm3f.pdf [file supp_RA119.009291_152730_2_supp_360630_pqfm3f.pdf]

## Supporting Information

### Live-cell assays reveal selectivity and sensitivity of the multidrug response in budding yeast

Elena Vanacloig-Pedros<sup>1</sup>, Carlos Lozano-Pérez<sup>2</sup>, Benito Alarcón<sup>2</sup>, Amparo Pascual-Ahuir<sup>1</sup>, and Markus Proft<sup>2</sup>

<sup>1</sup> Department of Biotechnology, Instituto de Biología Molecular y Celular de Plantas, Universitat Politècnica de València, 46022 Valencia, Spain.

<sup>2</sup> Department of Molecular and Cellular Pathology and Therapy, Instituto de Biomedicina de Valencia IBV-CSIC, 46010 Valencia, Spain.

Figure S1: Dose response profiles of Pdr1, Pdr3, Pdr8, Yrm1, Yrr1, and Stb5 upon different xenobiotic treatments.

Figure S2: Dose response of the Pdr TF mutants *pdr1*, *pdr3*, *pdr8*, *yrm1*, and *yrr1* using a PDRE-luciferase live cell reporter.

Table S1: Yeast strains used in this study.

Table S2: Plasmid constructions used in this study.

Table S3: Oligonucleotides used in this study.

Figure S1

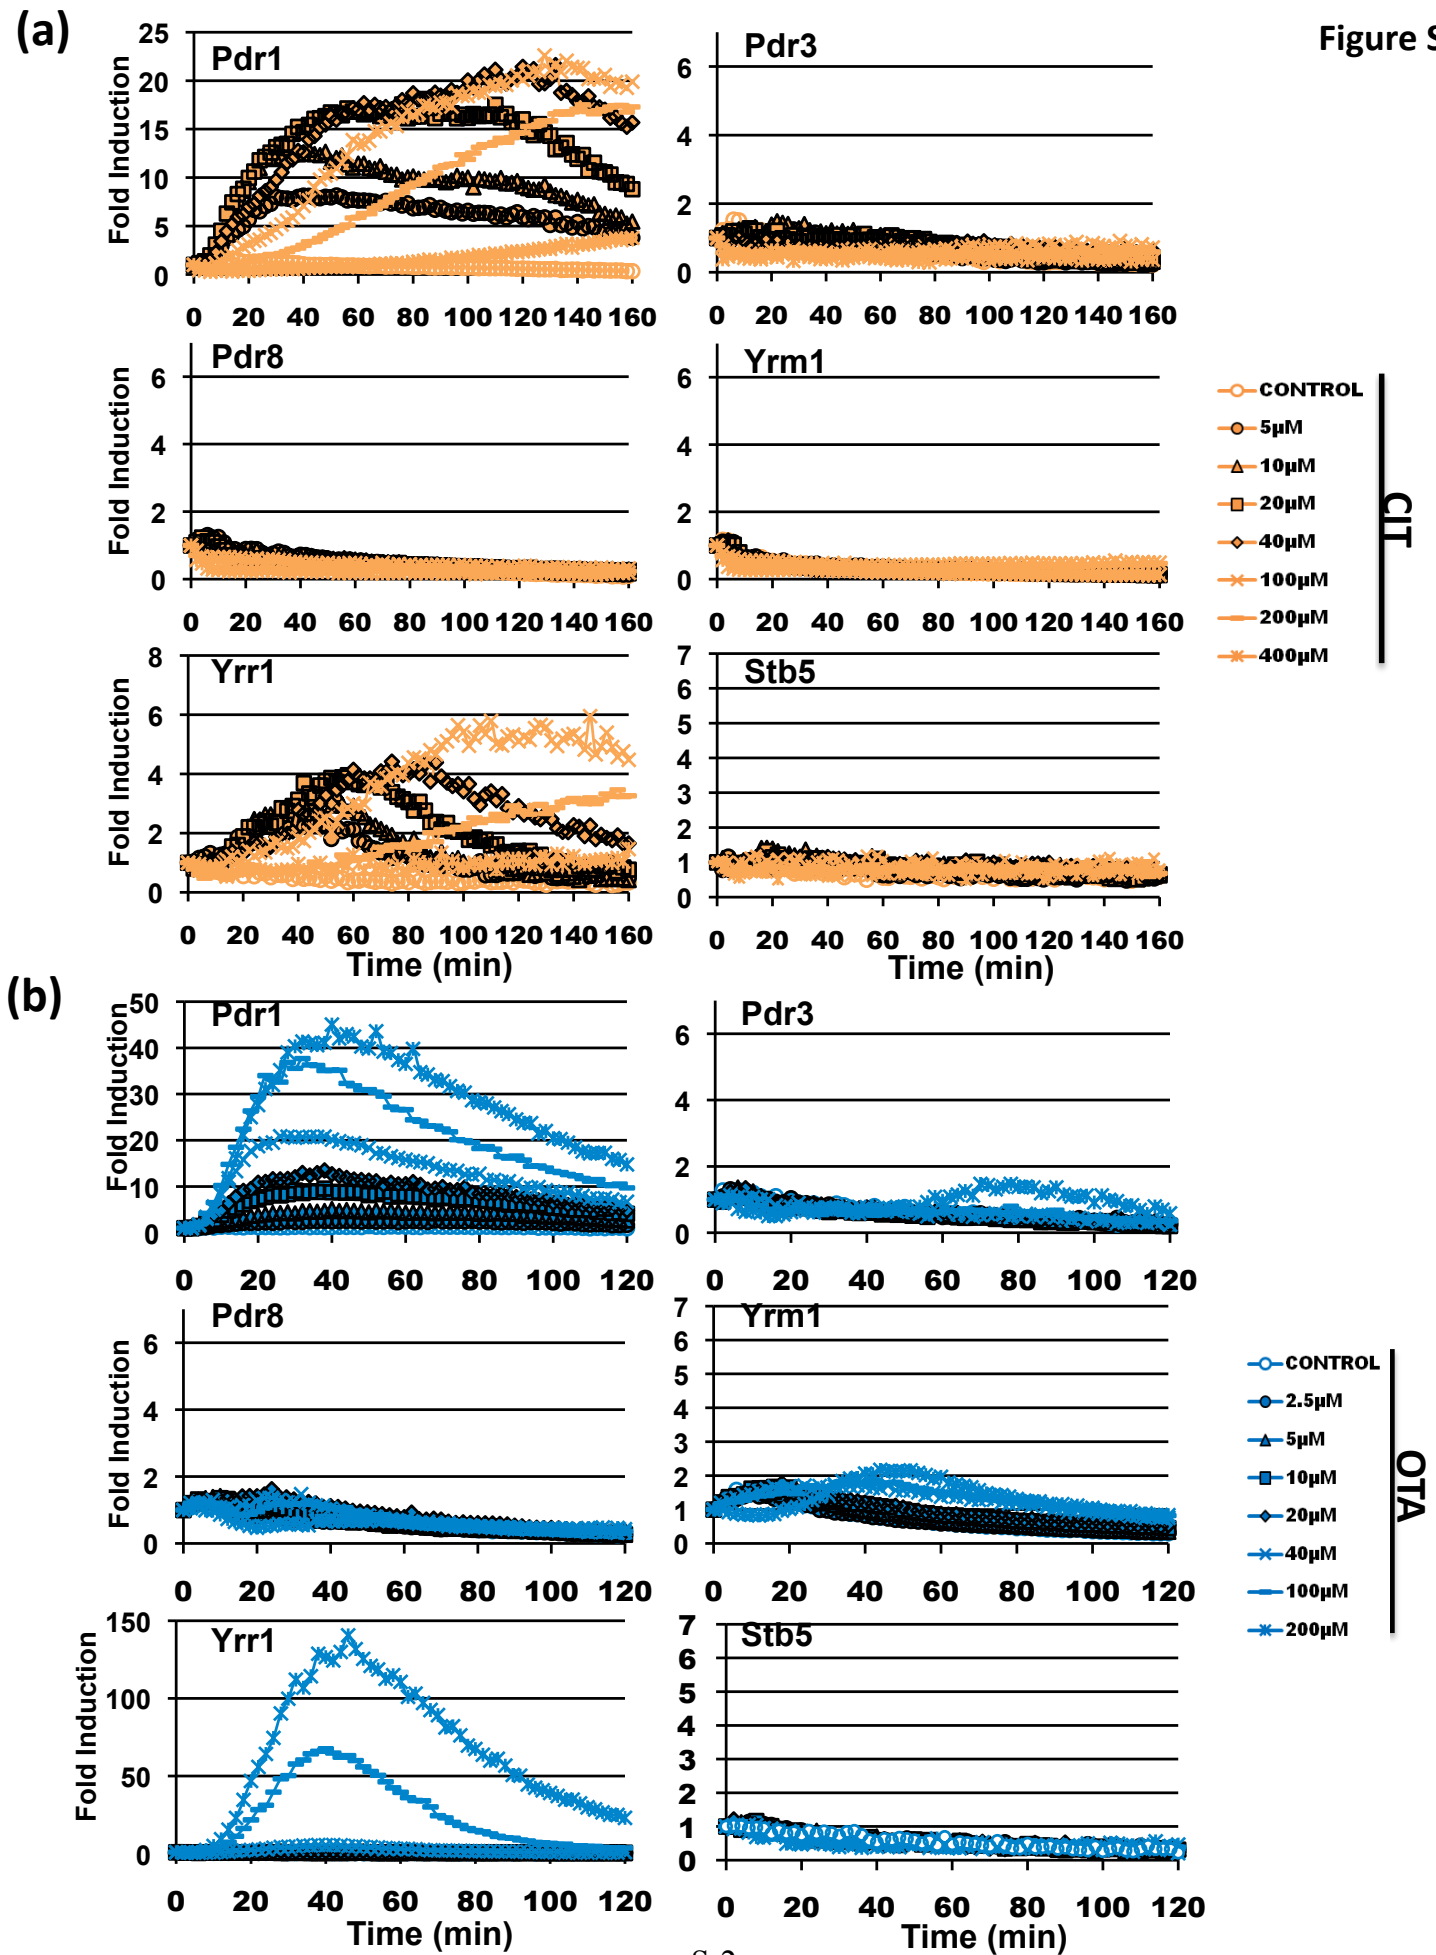

Figure S1

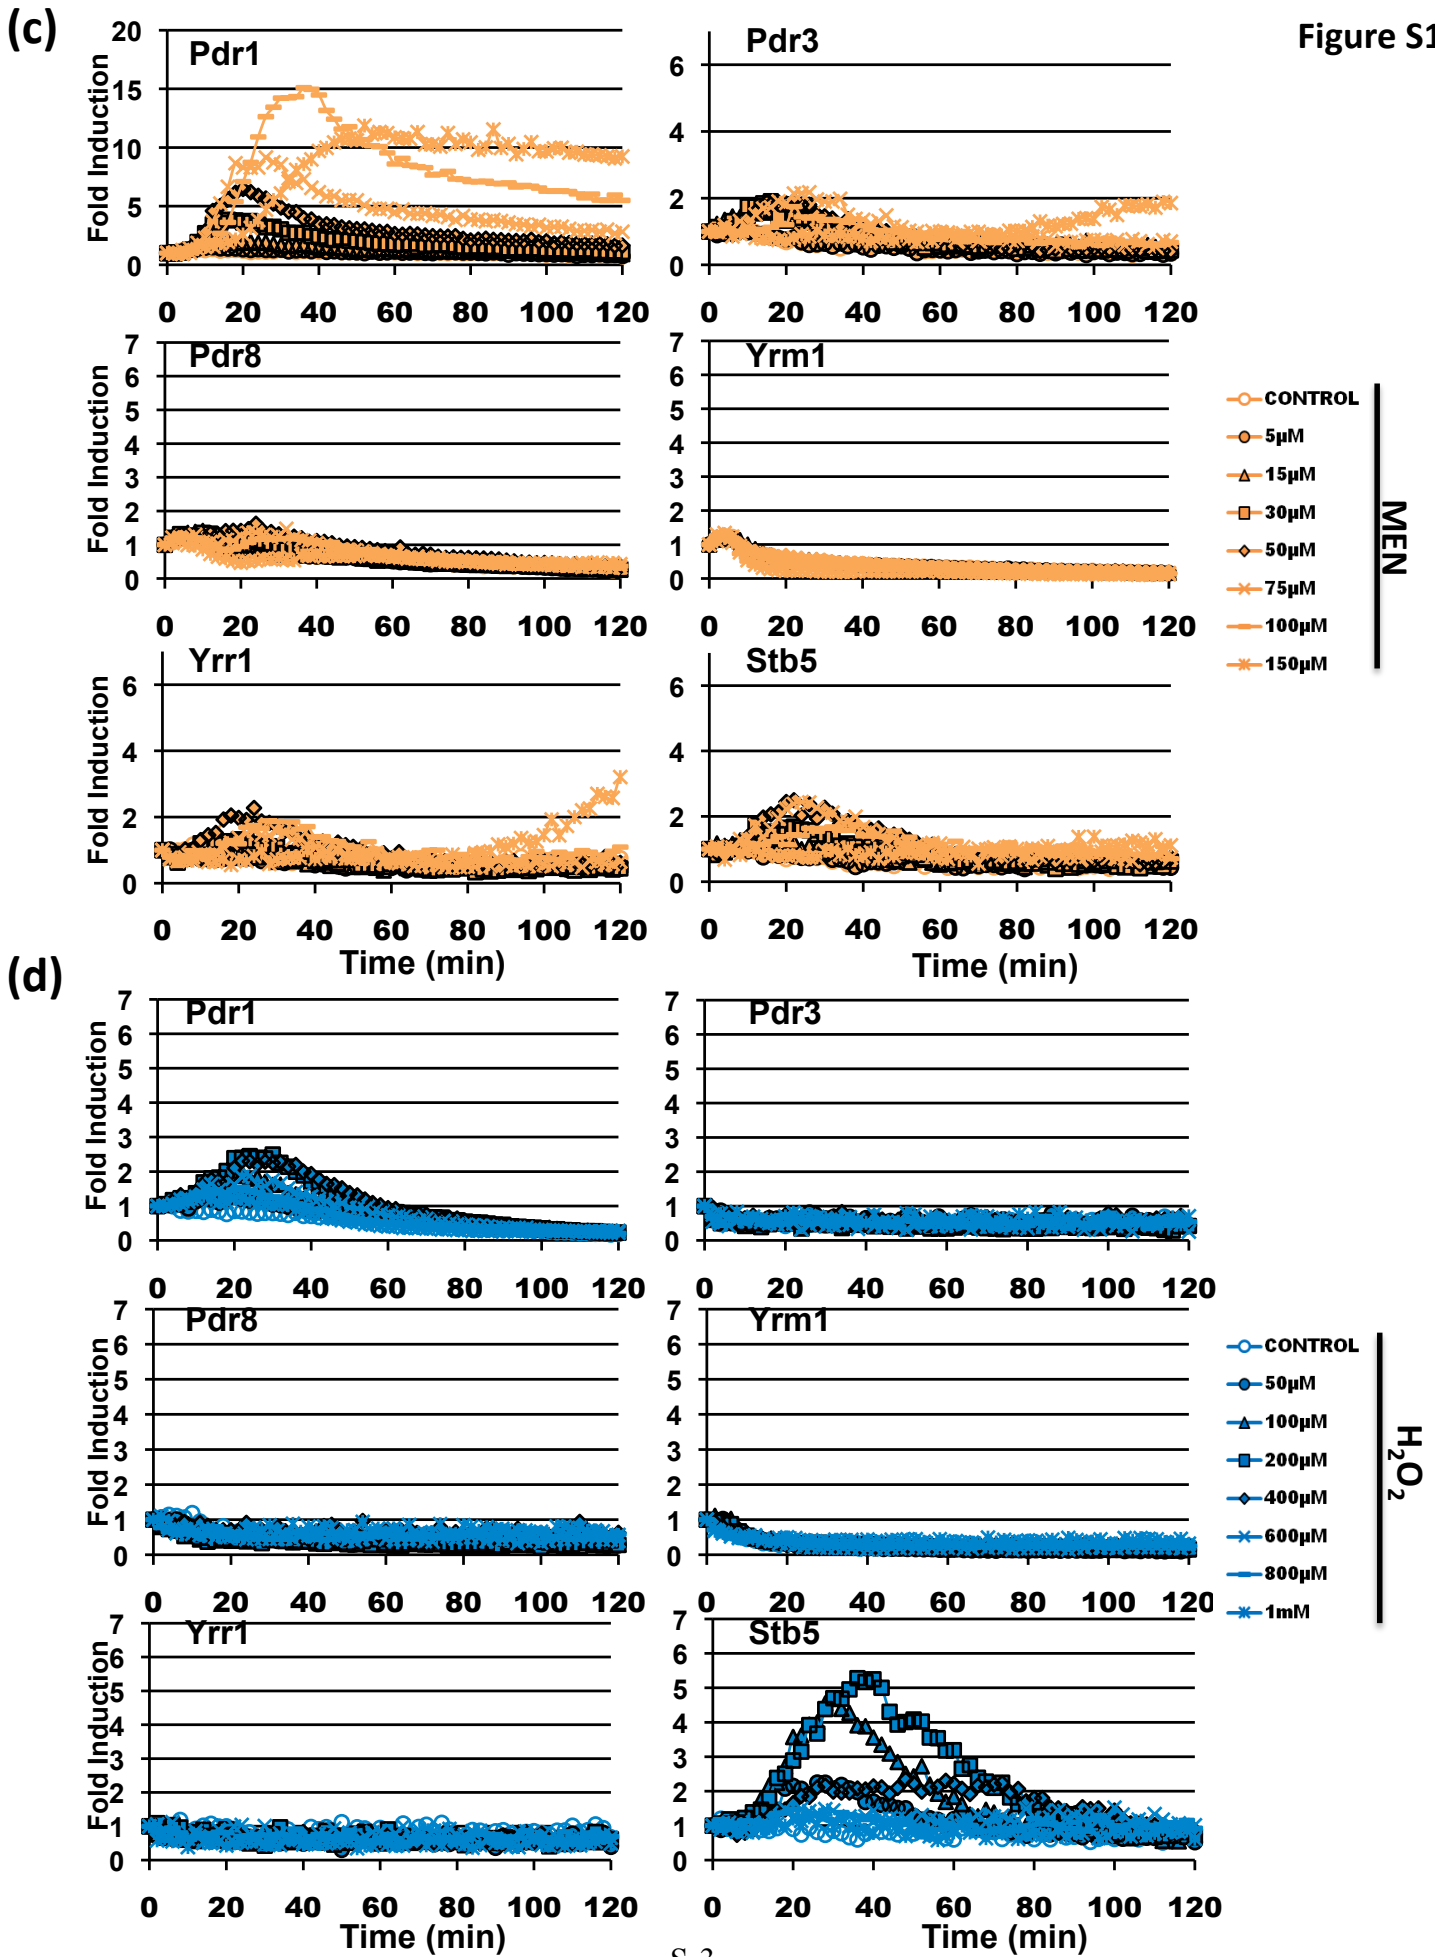

**Figure S1. Dose response profiles of six Pdr TFs upon different xenobiotic treatment.** The indicated transcription factors were expressed as Gal4<sub>DBD</sub> hybrid proteins and their transactivation activity measured in real time with a GAL1<sub>UAS</sub>-lucCP<sup>+</sup> reporter as explained in Fig. 4. The gene expression profiles were determined upon exposure of the indicated concentrations of CIT (a), OTA (b), MEN (c) and H<sub>2</sub>O<sub>2</sub> (d). The light emission from three independent culture aliquots was continuously measured. The fold induction was calculated as described in Materials. SD was <15% throughout the experiment, but is not included in the graphs.

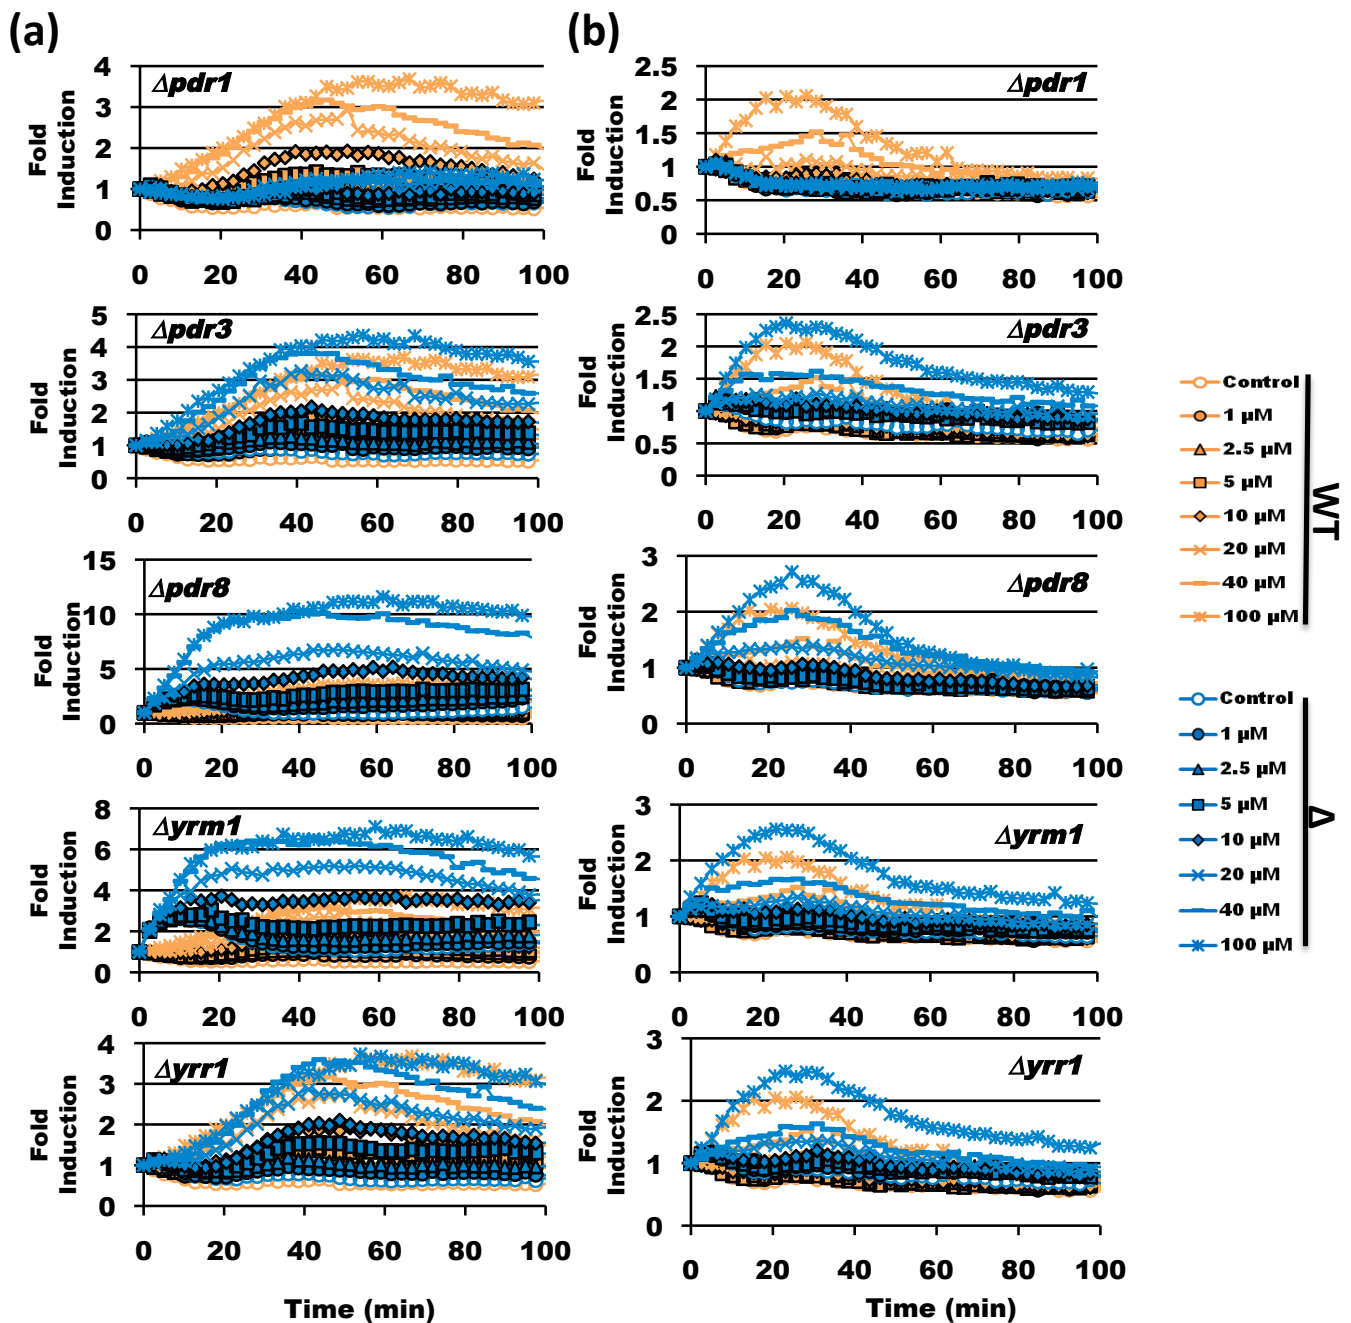

Figure S2. **The dose dependent response of Pdr TF mutants upon CIT and OTA exposure.** The indicated yeast strains were assayed with a PDRE-lucCP<sup>+</sup> live cell reporter. Dose response profiles are shown upon the treatment with the indicated CIT (a) or OTA (b) concentrations. The light emission from three independent culture aliquots was continuously measured. The fold induction was calculated as described in Materials. SD was <15% throughout the experiment, but is not included in the graphs.

Table S1: Yeast strains used in this study

| Name                                                                          |                                                                                                                                | Source     |
|-------------------------------------------------------------------------------|--------------------------------------------------------------------------------------------------------------------------------|------------|
| BY4741                                                                        | <i>MATa; his3Δ1; leu2Δ0; met15Δ0; ura3Δ0</i>                                                                                   | EUROSCARF  |
| BY4741-3xPDRE-lucCP <sup>+</sup>                                              | BY4741 with plasmid pAG413-3xPDRE-LucCP <sup>+</sup>                                                                           | This study |
| <i>Δpdr1</i> -3xPDRE-lucCP <sup>+</sup>                                       | BY4741 with <i>pdr1::KAN</i> with plasmid pAG413-3xPDRE-lucCP <sup>+</sup>                                                     | This study |
| <i>Δpdr3</i> -3xPDRE-lucCP <sup>+</sup>                                       | BY4741 with <i>pdr3::KAN</i> with plasmid pAG413-3xPDRE-lucCP <sup>+</sup>                                                     | This study |
| <i>Δpdr8</i> -3xPDRE-lucCP <sup>+</sup>                                       | BY4741 with <i>pdr8::KAN</i> with plasmid pAG413-3xPDRE-lucCP <sup>+</sup>                                                     | This study |
| <i>Δyrm1</i> -3xPDRE-lucCP <sup>+</sup>                                       | BY4741 with <i>yrm1::KAN</i> with plasmid pAG413-3xPDRE-lucCP <sup>+</sup>                                                     | This study |
| <i>Δyrr1</i> -3xPDRE-lucCP <sup>+</sup>                                       | BY4741 with <i>yrr1::KAN</i> with plasmid pAG413-3xPDRE-lucCP <sup>+</sup>                                                     | This study |
| PDR5-lucCP <sup>+</sup>                                                       | BY4741 with pPDR5-lucCP <sup>+</sup> -CYC1T-KANMX4                                                                             | This study |
| PDR15-lucCP <sup>+</sup>                                                      | BY4741 with pPDR15-lucCP <sup>+</sup> -CYC1T-KANMX4                                                                            | This study |
| SNQ2-lucCP <sup>+</sup>                                                       | BY4741 with pSNQ2-lucCP <sup>+</sup> -CYC1T-KANMX4                                                                             | This study |
| YOR1-lucCP <sup>+</sup>                                                       | BY4741 with pYOR1-lucCP <sup>+</sup> -CYC1T-KANMX4                                                                             | This study |
| <i>Δpdr1</i> -PDR5-lucCP <sup>+</sup>                                         | BY4741 <i>pdr1::HIS3</i> with pPDR5-lucCP <sup>+</sup> -CYC1T-KANMX4                                                           | This study |
| <i>Δpdr1</i> -PDR15-lucCP <sup>+</sup>                                        | BY4741 <i>pdr1::HIS3</i> with pPDR15-lucCP <sup>+</sup> -CYC1T-KANMX4                                                          | This study |
| <i>Δpdr1</i> -SNQ2-lucCP <sup>+</sup>                                         | BY4741 <i>pdr1::HIS3</i> with pSNQ2-lucCP <sup>+</sup> -CYC1T-KANMX4                                                           | This study |
| <i>Δpdr3</i> -PDR5-lucCP <sup>+</sup>                                         | BY4741 <i>pdr3::HIS3</i> with pPDR5-lucCP <sup>+</sup> -CYC1T-KANMX4                                                           | This study |
| <i>Δpdr3</i> -PDR15-lucCP <sup>+</sup>                                        | BY4741 <i>pdr3::HIS3</i> with pPDR15-lucCP <sup>+</sup> -CYC1T-KANMX4                                                          | This study |
| <i>Δpdr3</i> -SNQ2-lucCP <sup>+</sup>                                         | BY4741 <i>pdr3::HIS3</i> with pSNQ2-lucCP <sup>+</sup> -CYC1T-KANMX4                                                           | This study |
| W303-1A                                                                       | <i>MATa; can1-100, his3-11'15, leu2-3'112, trp1-1, ura3-1, ade2-1</i>                                                          | R. Serrano |
| <i>Δgal4</i>                                                                  | W303-1A with <i>gal4::KANMX4</i>                                                                                               | This study |
| <i>Δgal4 Gal4<sub>DBD</sub></i> -Pdr1                                         | W303-1A <i>gal4::KANMX4</i> with pGBKT7-ADH1p-Gal4 <sub>DBD</sub> -Pdr1-myc                                                    | This study |
| <i>Δgal4 Gal4<sub>DBD</sub></i> -Pdr3                                         | W303-1A <i>gal4::KANMX4</i> with pGBKT7-ADH1p-Gal4 <sub>DBD</sub> -Pdr3-myc                                                    | This study |
| <i>Δgal4 Gal4<sub>DBD</sub></i> -Pdr8                                         | W303-1A <i>gal4::KANMX4</i> with pGBKT7-ADH1p-Gal4 <sub>DBD</sub> -Pdr8-myc                                                    | This study |
| <i>Δgal4 Gal4<sub>DBD</sub></i> -Yrm1                                         | W303-1A <i>ga14::KANMX4</i> with pGBKT7-ADH1p-Gal4 <sub>DBD</sub> -Yrm1-myc                                                    | This study |
| <i>Δgal4 Gal4<sub>DBD</sub></i> -Yrr1                                         | W303-1A <i>gal4::KANMX4</i> with pGBKT7-ADH1p-Gal4 <sub>DBD</sub> -Yrr1-myc                                                    | This study |
| <i>Δgal4 Gal4<sub>DBD</sub></i> -Stb5                                         | W303-1A <i>gal4::KANMX4</i> with pGBKT7-ADH1p-Gal4 <sub>DBD</sub> -Stb5-myc                                                    | This study |
| <i>Δgal4 Gal4<sub>DBD</sub></i> -Pdr1 GAL1 <sub>UAS</sub> -lucCP <sup>+</sup> | W303-1A <i>gal4::KANMX4</i> with pGBKT7-ADH1p-Gal4 <sub>DBD</sub> -Pdr1-myc and pAG413-GAL1 <sub>UAS</sub> -lucCP <sup>+</sup> | This study |
| <i>Δgal4 Gal4<sub>DBD</sub></i> -Pdr3 GAL1 <sub>UAS</sub> -lucCP <sup>+</sup> | W303-1A <i>gal4::KANMX4</i> with pGBKT7-ADH1p-Gal4 <sub>DBD</sub> -Pdr3-myc and pAG413-GAL1 <sub>UAS</sub> -lucCP <sup>+</sup> | This study |
| <i>Δgal4 Gal4<sub>DBD</sub></i> -Pdr8 GAL1 <sub>UAS</sub> -lucCP <sup>+</sup> | W303-1A <i>gal4::KANMX4</i> with pGBKT7-ADH1p-Gal4 <sub>DBD</sub> -Pdr8-myc and pAG413-GAL1 <sub>UAS</sub> -lucCP <sup>+</sup> | This study |
| <i>Δgal4 Gal4<sub>DBD</sub></i> -Yrm1 GAL1 <sub>UAS</sub> -lucCP <sup>+</sup> | W303-1A <i>ga14::KANMX4</i> with pGBKT7-ADH1p-Gal4 <sub>DBD</sub> -Yrm1-myc and pAG413-GAL1 <sub>UAS</sub> -lucCP <sup>+</sup> | This study |
| <i>Δgal4 Gal4<sub>DBD</sub></i> -Yrr1 GAL1 <sub>UAS</sub> -lucCP <sup>+</sup> | W303-1A <i>gal4::KANMX4</i> with pGBKT7-ADH1p-Gal4 <sub>DBD</sub> -Yrr1-myc and pAG413-GAL1 <sub>UAS</sub> -lucCP <sup>+</sup> | This study |
| <i>Δgal4 Gal4<sub>DBD</sub></i> -Stb5 GAL1 <sub>UAS</sub> -lucCP <sup>+</sup> | W303-1A <i>gal4::KANMX4</i> with pGBKT7-ADH1p-Gal4 <sub>DBD</sub> -Stb5-myc and pAG413-GAL1 <sub>UAS</sub> -lucCP <sup>+</sup> | This study |
| PDR1-HA                                                                       | BY4741 with <i>PDR1</i> -3xHA-KANMX4                                                                                           | This study |
| PDR3-HA                                                                       | BY4741 with <i>PDR3</i> -3xHA-KANMX4                                                                                           | This study |

Table S2: Plasmid constructions used in this study.

| <b>Name</b>                                    | <b>Description</b>                                                  | <b>Source</b>                      |
|------------------------------------------------|---------------------------------------------------------------------|------------------------------------|
| pUG6-lucCP <sup>+</sup> -CYC1T-KAN             | <i>AmpR, lucCP<sup>+</sup>-Cyc1T-loxp-KANMX-loxp</i>                | Pascual-Ahuir <i>et al.</i> , 2019 |
| pAG413-CYC1Δ-lucCP <sup>+</sup>                | <i>AmpR, CEN, HIS3, pCYC1Δ-lucCP<sup>+</sup></i>                    | Rienzo <i>et al.</i> , 2012        |
| pAG413-3xPDRE-lucCP <sup>+</sup>               | <i>AmpR, CEN, HIS3, pCYC1Δ-3xPDRE-lucCP<sup>+</sup></i>             | This study                         |
| pAG413-GAL1 <sub>UAS</sub> -lucCP <sup>+</sup> | <i>AmpR, CEN, HIS3, pCYC1Δ-GAL1<sub>UAS</sub>-lucCP<sup>+</sup></i> | This study                         |
| pGBKT7-ADH1p-Gal4 <sub>DBD</sub> -myc          | <i>KanR, TRP1</i>                                                   | Clontech                           |
| pGBKT7-ADH1p-Gal4 <sub>DBD</sub> -Pdr1-myc     | pGBKT7 with Pdr1 XBD                                                | This study                         |
| pGBKT7-ADH1p-Gal4 <sub>DBD</sub> -Pdr3-myc     | pGBKT7 with Pdr3 XBD                                                | This study                         |
| pGBKT7-ADH1p-Gal4 <sub>DBD</sub> -Pdr8-myc     | pGBKT7 with Pdr8 XBD                                                | This study                         |
| pGBKT7-ADH1p-Gal4 <sub>DBD</sub> -Yrm1-myc     | pGBKT7 with Yrm1 XBD                                                | This study                         |
| pGBKT7-ADH1p-Gal4 <sub>DBD</sub> -Yrr1-myc     | pGBKT7 with Yrr1 XBD                                                | This study                         |
| pGBKT7-ADH1p-Gal4DBD-Stb5-myc                  | pGBKT7 with Stb5 XBD                                                | This study                         |

Table S3: Oligonucleotides used in this study.

| Name                       | Sequence 5' - 3'                                                         | Description                                                          |
|----------------------------|--------------------------------------------------------------------------|----------------------------------------------------------------------|
| PDR5-luc-KAN1              | CTTTAAGTTTTCGTATCCGCTCGTTTCGAAAGACTTTAGACAAAA<br>CCATGGCCGATGCTAAGAAC    | Forward primer for <i>PDR5</i> replacement with lucCP <sup>+</sup>   |
| PDR5-luc-KAN2              | GTCCATCTTGGAAGTTTCTTTTCTTAACCAAATTCAAAATTCTA<br>GCATAGGCCACTAGTGGATCTG   | Reverse primer for <i>PDR5</i> replacement with lucCP <sup>+</sup>   |
| PDR5-292                   | GTGGTACGATATCTGTTGAACG                                                   | Forward primer to verify lucCP <sup>+</sup> integration              |
| SNQ2-luc-KAN1              | AGTGGATAGAATAACACAGCTACCAAAATACGTAAAGAGAATT<br>CACCATGGCCGATGCTAAGAAC    | Forward primer for <i>SNQ2</i> replacement with lucCP <sup>+</sup>   |
| SNQ2-luc-KAN2              | AAAGGCAGATGAATGCACAAAATGTTAAGTTATCTGAAGCCCA<br>CAGCATAGGCCACTAGTGGATCTG  | Reverse primer for <i>SNQ2</i> replacement with lucCP <sup>+</sup>   |
| SNQ2-273                   | CAAGTTGAAGTGTGCGAGGTC                                                    | Forward primer to verify lucCP <sup>+</sup> integration              |
| PDR15-luc-KAN1             | ACACACACACACAAGCAAACACACTTATAATTATCAAAAACC<br>TCCATGGCCGATGCTAAGAAC      | Forward primer for <i>PDR15</i> replacement with lucCP <sup>+</sup>  |
| PDR15-luc-KAN2             | TATAATAAAAAGATAATATACTAAAAAAGGAAAATAACGTC<br>AGCATAGGCCACTAGTGGATCTG     | Reverse primer for <i>PDR15</i> replacement with lucCP <sup>+</sup>  |
| PDR15-278                  | CTGCTACTGCTGTGCGAGAC                                                     | Forward primer to verify lucCP <sup>+</sup> integration              |
| YOR1-luc-KAN1              | CTGTTTTTATATTCAAAAAGAGTAAAGCCGTTGCTATATACGAAT<br>CCATGGCCGATGCTAAGAAC    | Forward primer for <i>YOR1</i> replacement with lucCP <sup>+</sup>   |
| YOR1-luc-KAN2              | CATATAAATAAAATAAAGAGAAAAATCATGCAACAAATAATATA<br>AAGCATAGGCCACTAGTGGATCTG | Reverse primer for <i>YOR1</i> replacement with lucCP <sup>+</sup>   |
| YOR1-247                   | ACACATCTGTCAGAGGTAGC                                                     | Forward primer to verify lucCP <sup>+</sup> integration              |
| LucSeqRev                  | GGTGATGTCCACCTCAATG                                                      | Reverse primer to verify lucCP <sup>+</sup> integration              |
| Kan-B                      | GGATGTATGGGCTAAATG                                                       | Reverse primer to verify KanMX integration                           |
| BspEI-EcoRV-3xPDRE-1       | CCGGCGATATCTCCGTGGATAGAATACATCCGTGGATCGCGATC<br>ATCCGTGGAT               | 3xPDRE containing oligonucleotide for PDRE-lucCP <sup>+</sup> fusion |
| BspEI-EcoRV-3xPDRE-2       | CCGGATCCACGGATGATCGCGATCCACGGATGTATTCTATCCAC<br>GGAGATATCG               | 3xPDRE containing oligonucleotide for PDRE-lucCP <sup>+</sup> fusion |
| Gal4D1                     | ACGCCATCATTTTAAGAGAGGACAGAGAAGCAAGCCTCCTGAA<br>AGCAGCTGAAGCTTCGTACGC     | Forward primer for gal4::KanMX deletion                              |
| Gal4D2                     | CAGTTGAAGTGAAGTTCGCGGGTTTTTCAGTATCTACGATTCAT<br>TGCATAGGCCACTAGTGGATCTG  | Reverse primer for gal4::KanMX deletion                              |
| Gal4Chk                    | TTGAGACAGCATTGCGCCAG                                                     | Forward primer to verify KanMX integration                           |
| Gal1 <sub>UAS</sub> -MunI  | CCGGCAATTGTGGAAATGTAAAGAGCCCC                                            | Forward primer for <i>GAL1<sub>UAS</sub></i> (-551/-336)             |
| Gal1 <sub>UAS</sub> -Kpn2I | ATCGTCCGGAGCAGTGC GGCGCGAG                                               | Reverse primer for <i>GAL1<sub>UAS</sub></i> (-551/-336)             |
| PDR1-NcoI-N                | CATGCCATGGGTGGCGCTCGAATAAAAAACC                                          | Forward primer for Gal1 <sub>UAS</sub> -Pdr1(81-1068) fusion         |
| PDR1-BamHI-N               | CATGGATCCAAACGTATACGTTTAACTATCTGG                                        | Reverse primer for Gal1 <sub>UAS</sub> -Pdr1(81-1068) fusion         |
| PDR3-NcoI                  | CATGCCATGGATAGTTCAGTCTTTGCC                                              | Forward primer for Gal1 <sub>UAS</sub> -Pdr3(53-976) fusion          |
| PDR3-BamHI                 | CATGGATCCGTTTTTCATAAGAAGGGATATG                                          | Reverse primer for Gal1 <sub>UAS</sub> -Pdr3(53-976) fusion          |
| YRM1-NcoI                  | CATGCCATGGAGTTATTTGGCAGTACTCCG                                           | Forward primer for Gal1 <sub>UAS</sub> -Yrm1(73-786) fusion          |
| YRM1-BamHI                 | CATGGATCCTCTACTGCGTATCAAATAA                                             | Reverse primer for Gal1 <sub>UAS</sub> -Yrm1(73-786) fusion          |
| YRR1-NcoI                  | CATGCCATGGAAAAGAAAGCTACCTATGGTCC                                         | Forward primer for Gal1 <sub>UAS</sub> -Yrr1(93-810) fusion          |
| YRR1-BamHI                 | CATGGATCCTCGACTTAGCATTAAATTGTC                                           | Reverse primer for Gal1 <sub>UAS</sub> -Yrr1(93-810) fusion          |
| PDR8-EcoRI                 | CATGAATTCGAGCAAGTGCCCAATGTAG                                             | Forward primer for Gal1 <sub>UAS</sub> -Pdr8(74-701) fusion          |
| PDR8-BamHI                 | CATGGATCCATGTAAAAAATACATCAATC                                            | Reverse primer for Gal1 <sub>UAS</sub> -Pdr8(74-701) fusion          |
| STB5-EcoRI                 | CATGAATTCAGAAGGAGTTAGCGGATGC                                             | Forward primer for Gal1 <sub>UAS</sub> -Stb5(59-743) fusion          |
| STB5-BamHI                 | CATGGATCCTCGGTGAACATATGTCATAC                                            | Reverse primer for Gal1 <sub>UAS</sub> -Stb5(59-743) fusion          |
